# Supplementary material for: A complementary electrochromic device based on W18O49 nanowire arrays and Prussian blue thin films
Source: Royal Society of Chemistry journal article supplement (doi:10.1039/c5ra16056a), 2015-10-30
Supplement: c5ra16056a1.pdf [file c5ra16056a1.pdf]

## Supporting information

# A complementary electrochromic device based on $W_{18}O_{49}$ nanowire arrays and Prussian blue thin films

Chih-Hao Lu<sup>a</sup>, Min-Hsiung Hon<sup>a, b</sup>, Chi-Yun Kuan<sup>c</sup>, and Ing-Chi Leu<sup>\*d</sup>

<sup>d</sup>Department of Materials Science, National University of Tainan, Tainan, Taiwan,  
Republic of China. E-mail: [icleu@mail.mse.ncku.edu.tw](mailto:icleu@mail.mse.ncku.edu.tw)

Table S1 The coloration and bleaching times of the tungsten oxide films for 50% and 90% modulation

Table 1 The coloration and bleaching times of the tungsten oxide films for 50% and 90% modulation

| Samples                                                         | Coloration times |             | Bleaching times |             | Reference     |
|-----------------------------------------------------------------|------------------|-------------|-----------------|-------------|---------------|
|                                                                 | $t_c(50\%)$      | $t_c(90\%)$ | $t_b(50\%)$     | $t_b(90\%)$ |               |
| W <sub>18</sub> O <sub>49</sub> nanowire arrays                 | 10.8 s           | 51.5 s      | 3.1 s           | 7.3 s       | Present study |
| W <sub>18</sub> O <sub>49</sub> nanowire arrays + Prussian blue | 6.9 s            | 36.8 s      | 1.2 s           | 1.9 s       | Present study |
| Assembled nanorods                                              | 13 s             | 272 s       | 8 s             | 364 s       | Ref. 35       |
| Plate-like nanostructures                                       | 22 s             | 236 s       | 23 s            | 95 s        | Ref. 40       |

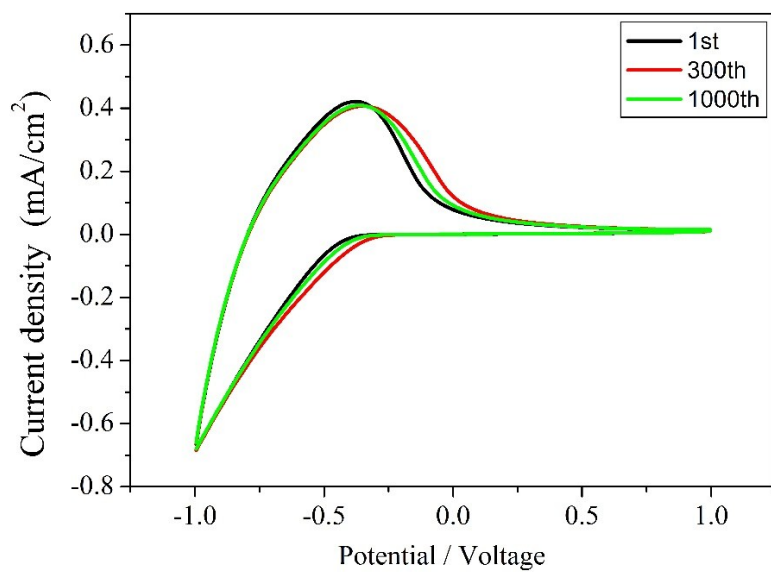

Fig. S1 C-V curves of the complementary device for the different cycles measured in  $\text{LiClO}_4/\text{PMMA}/\text{PC}$  solution with a sweep rate of  $100 \text{ mV s}^{-1}$ .
